# Supplementary material
Source: MDPI journal article supplement (https://www.mdpi.com/2073-4395/11/5/886)
Supplement: s1 [file s1]

# Physicochemical characterization of *Crithmum maritimum* L. and *Daucus carota* subsp. *gummifer* (Syme) Hook.fil. and their antimicrobial activity against apple tree and grapevine phytopathogens

Eva Sánchez-Hernández, Laura Buzón-Durán, Celia Andrés-Juan, Belén Lorenzo-Vidal, Jesús Martín-Gil and Pablo Martín-Ramos

## SUPPORTING INFORMATION

### 1. Elemental analysis of the biomass from *Crithmum maritimum* and *Daucus carota* subsp. *gummifer*

**Table S1.** Elemental (CHNSO) composition (wt%) of *C. maritimum* and *D. carota* fractions

|                     |         | C      | H    | N     | S     | O     | C/N ratio |
|---------------------|---------|--------|------|-------|-------|-------|-----------|
| <i>C. maritimum</i> | flowers | 40.43% | 6.2% | 1.61% | 0.06% | 51.7% | 23.1      |
|                     | leaves  | 36.63% | 6.3% | 1.47% | 0.10% | 55.5% | 24.9      |
|                     | stems   | 40.02% | 6.2% | 0.73% | 0.05% | 53.0% | 55.1      |
| <i>D. carota</i>    | flowers | 42.18% | 6.3% | 2.51% | 0.07% | 48.9% | 16.8      |
|                     | leaves  | 39.86% | 6.4% | 1.95% | 0.31% | 51.4% | 20.4      |
|                     | stems   | 42.78% | 6.3% | 0.62% | 0.01% | 50.3% | 70.9      |
|                     | roots   | 39.74% | 6.4% | 0.57% | 0.00% | 53.3% | 70.1      |

**Table S2.** Elemental composition (wt%) of *C. maritimum* and *D. carota* flowering aerial parts concentrate hydromethanolic extracts

|                     | C      | H    | N     | S     | O      | C/N ratio |
|---------------------|--------|------|-------|-------|--------|-----------|
| <i>C. maritimum</i> | 40.01% | 6.3% | 1.56% | 0.08% | 52.05% | 25.7      |
| <i>D. carota</i>    | 41.58% | 6.4% | 2.23% | 0.10% | 49.69% | 18.6      |

#### 1.1. Calorific values calculation

The calculation of calorific values from elemental analysis data was carried out according Equation:  $HHV = (0.341 \times \%C) + (1.322 \times \%H) - 0.12 (\%O + \%N)$ , where HHV is the heating value for the dry material, expressed in  $\text{kJ} \cdot \text{kg}^{-1}$ , and %C, %H, %O and %N are the mass fractions, expressed in wt% of dry material. This formula gives acceptable results for biomass, according to the UK's Combined Heat and Power Quality Assurance program.

The calculated higher heating values (HHV) for *C. maritimum* flowers, leaves and stems were 15.39, 13.97 and 13.39  $\text{kJ} \cdot \text{g}^{-1}$ , respectively, with a mean value of 14.9  $\text{kJ} \cdot \text{g}^{-1}$ . The HHV for *D. carota* were 16.55  $\text{kJ} \cdot \text{g}^{-1}$  (flowers), 15.66  $\text{kJ} \cdot \text{g}^{-1}$  (leaves), 16.81  $\text{kJ} \cdot \text{g}^{-1}$  (stems) and 15.53  $\text{kJ} \cdot \text{g}^{-1}$  (roots), with a mean value of 16.1  $\text{kJ} \cdot \text{g}^{-1}$ .

## 2. Thermal analysis of the biomass from *Crithmum maritimum* and *Daucus carota* subsp. *gummifer*

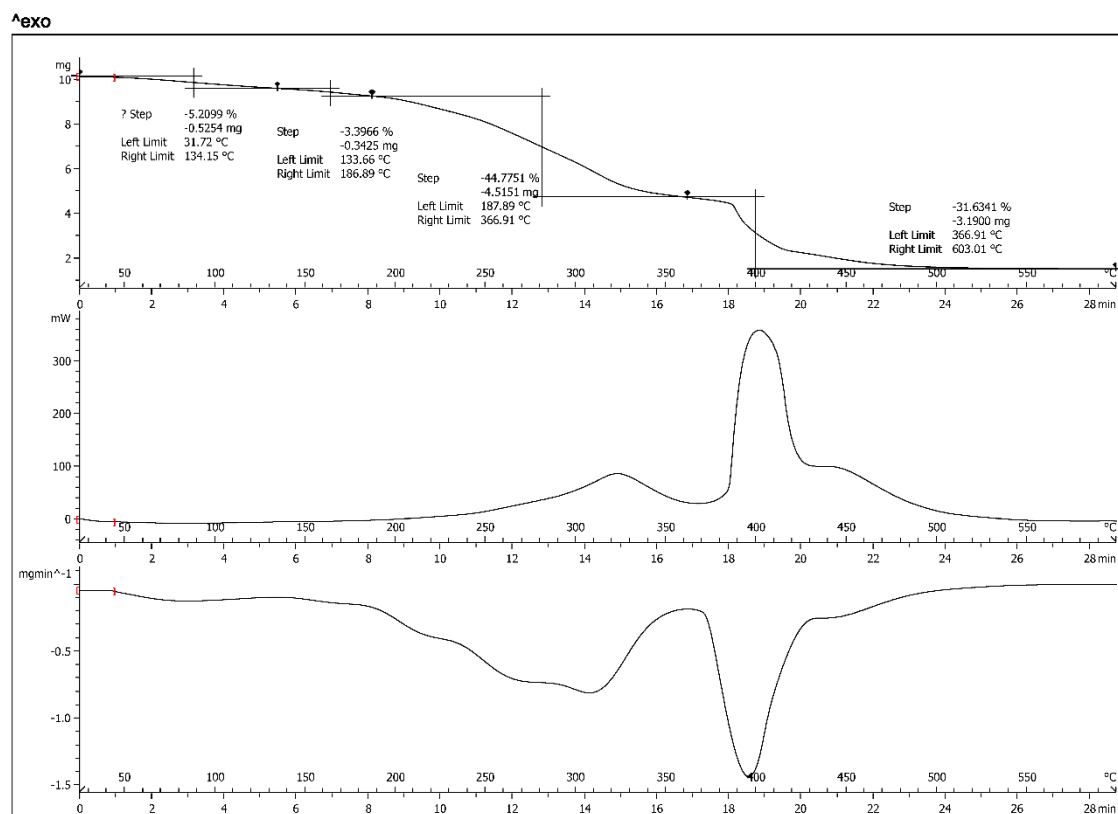

Figure S1. From top to bottom: TG, DSC and DTG curves for *C. maritimum*

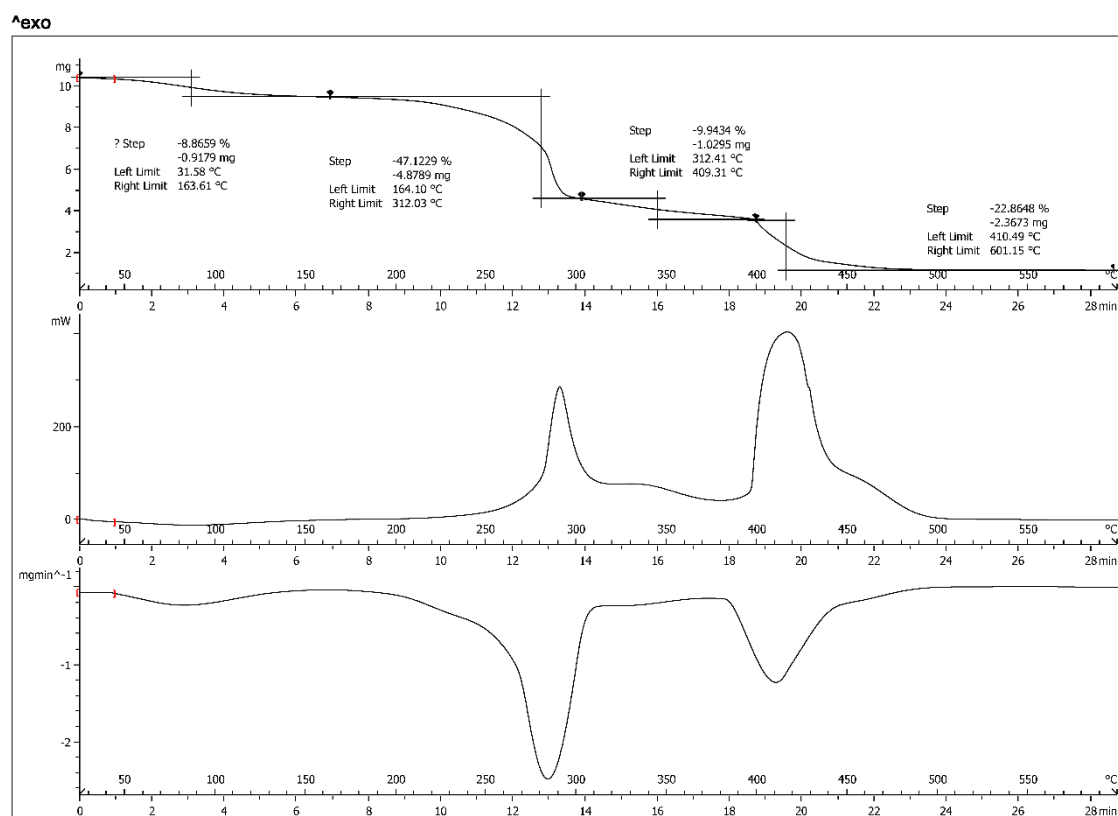

Figure S2. From top to bottom: TG, DSC and DTG curves for *D. carota* subsp. *gummifer*

### 3. Vibrational characterization of the biomass from *Crithmum maritimum* and *Daucus carota* subsp. *gummifer*

**Table S3.** Main bands in the ATR-FTIR spectra of various *C. maritimum* and *D. carota* subsp. *gummifer* fractions and their assignments.

| <i>C. maritimum</i> |        |       | <i>D. carota</i> |        |       | Assignment                                                                                                          |
|---------------------|--------|-------|------------------|--------|-------|---------------------------------------------------------------------------------------------------------------------|
| flowers             | leaves | stems | umbel            | leaves | stems |                                                                                                                     |
| 3381                | 3398   | 3366  | 3335             | 3277   | 3336  | Bonded O-H stretching (cellulose)                                                                                   |
|                     |        |       | 3285             |        | 3293  |                                                                                                                     |
| 2916                | 2916   | 2916  | 2918             | 2918   | 2917  | –CH <sub>2</sub> asymmetric stretching of alkyls (cutine, wax, pectin)                                              |
| 2849                | 2848   | 2848  | 2851             |        | 2850  | –CH <sub>2</sub> symm stretching (cutine and wax); CH <sub>2</sub> –(C6)– bend (cellulose)                          |
|                     |        | 2359  | 2360             |        | 2360  | C=N stretch (cyanogen glycosides)                                                                                   |
|                     |        | 2158  | 2158             |        | 2157  | CN stretching (HCN), suggesting anthocyanin                                                                         |
| 1732                | 1732   | 1731  | 1735             | 1732   | 1733  | C=O stretching of alkyl ester                                                                                       |
|                     |        |       |                  |        | 1652  | Amide I; C=C stretching (hydrocinamic acids of lignins); C=O stretch (hemicellulose, bonded ketones, quinone...)    |
| 1633                | 1629   | 1636  | 1635             |        | 1635  |                                                                                                                     |
|                     |        |       | 1598             | 1601   |       | Aromatic C=C skeletal stretching; COO <sup>-</sup> antisym. stretching (polygalacturonic, pectin ester)             |
|                     |        |       | 1558             |        | 1554  | Amide II                                                                                                            |
|                     |        |       |                  |        | 1540  | COO <sup>-</sup> symmetric stretching                                                                               |
| 1516                | 1516   | 1517  | 1511             | 1516   |       | Aromatic skeletal. Typical of carotenoids                                                                           |
|                     | 1472   | 1472  |                  |        | 1514  | C-H deformation (cellulose)                                                                                         |
| 1464                | 1463   | 1463  | 1457             |        | 1464  | H <sub>2</sub> O vapour; O-CH <sub>3</sub> stretch; C-H bend of CH <sub>2</sub> or CH <sub>3</sub>                  |
| 1417                | 1416   | 1432  | 1422             | 1418   | 1429  | CH <sub>2</sub> sym. bending (cellulose); arom C=C; COO <sup>-</sup> sym. stretch.                                  |
| 1361                | 1376   |       | 1378             | 1370   | 1380  |                                                                                                                     |
|                     |        |       | 1313             | 1320   | 1320  | C-H (cellulose)                                                                                                     |
| 1246                | 1242   | 1243  | 1230             | 1236   | 1241  | Amide III; C-C-O asym stretching acetylated glucomannan; C-O stretch of aryl ether; C-O and OH of COOH groups       |
| 1166                | 1168   | 1159  | 1146             | 1144   | 1150  | C-O-C in bridge asym. (cellulose); C-C in plane (β-carotene)                                                        |
| 1104                | 1106   |       |                  | 1093   |       | C-O-C stretching in the pyranose ring skeletal (cellulose)                                                          |
|                     |        | 1074  |                  |        |       | C-O and C-H stretching (cellulose I as cellulose Iβ).                                                               |
|                     | 1051   |       | 1047             | 1047   |       | C-O stretching (cellulose, aromatic ether)                                                                          |
|                     | 1034   |       |                  | 1031   | 1026  | Si-O of silicates, PO <sub>4</sub> residues                                                                         |
| 1019                | 1013   |       | 1014             | 1009   | 1008  | C-H bending (typical of carotenes); polygalacturonic acid (a variety of pectin in plant cuticles)                   |
|                     | 917    |       | 888              |        | 888   | β-glycosidic linkages (glucose units of cellulose chains), O-C=O in-plane def. or a CH <sub>2</sub> rocking deform. |
|                     |        |       | 812              | 804    |       | Ring vibration (pectin)                                                                                             |
|                     | 730    |       | 774              | 759    | 777   | Stearic acid                                                                                                        |
| 719                 | 719    | 719   |                  |        | 718   | In-plane deformation                                                                                                |
|                     |        |       | 668              |        | 667   | C-C out-of-plane bending                                                                                            |

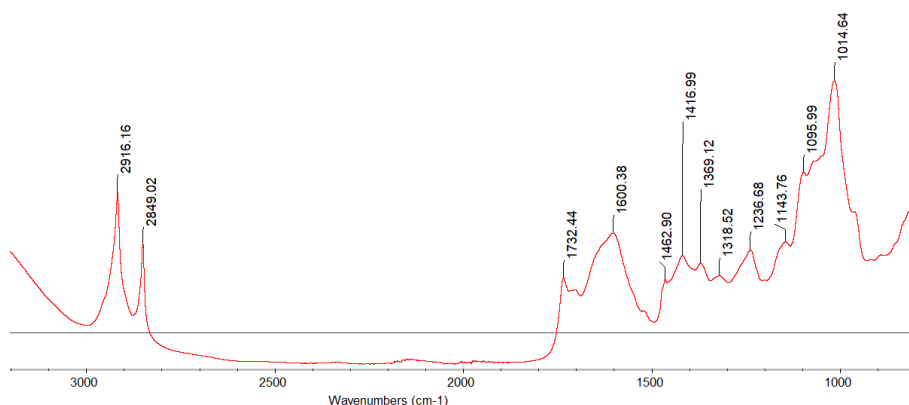

**Figure S3.** ATR-FTIR spectrum of *D. carota* subsp. *gummifer* hydromethanolic extract (concentrated gel).

#### 4. GC-MS characterization of *Crithmum maritimum* and *Daucus carota* subsp. *gummifer* hydromethanolic extracts

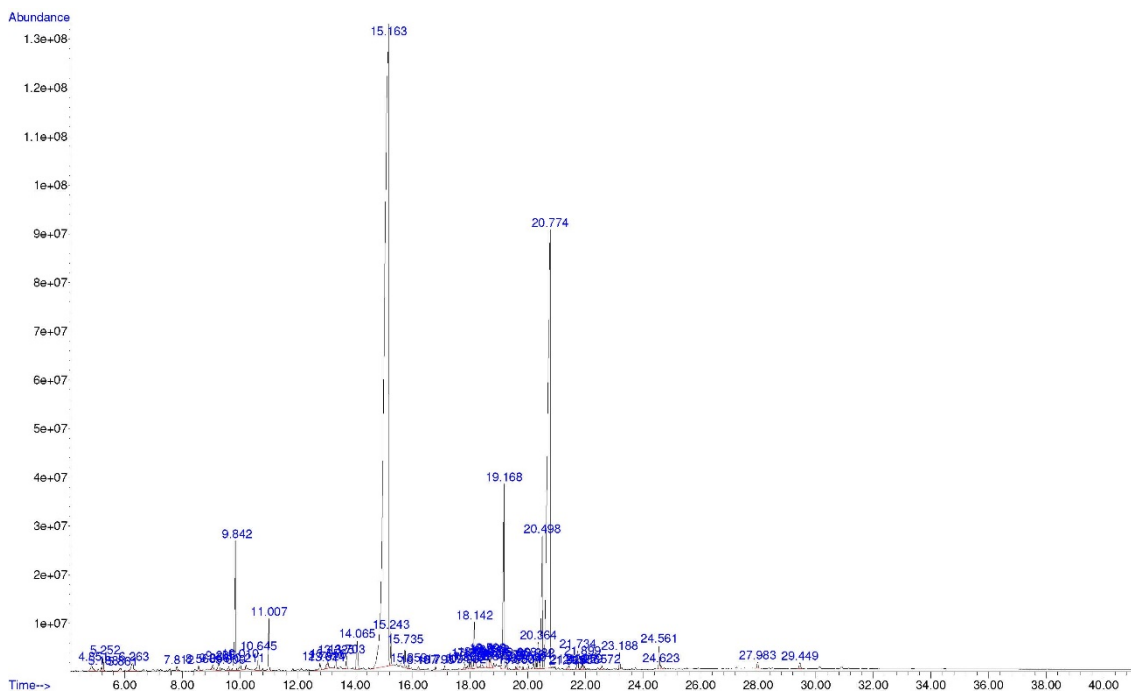

Figure S4. GC-MS spectrum of *C. maritimum* hydromethanolic extract

Table S4. GC/MS analysis of *C. maritimum* hydromethanolic extract

| Peak | RT (min) | Area (%) | Library/ID                                                           |
|------|----------|----------|----------------------------------------------------------------------|
| 1    | 4.8513   | 0.3044   | Oxime-, methoxy-phenyl-                                              |
| 2    | 5.1872   | 0.0549   | 2H-Tetrazole, 2,5-dimethyl-                                          |
| 3    | 5.2505   | 0.2497   | 2-Cyclopenten-1-one, 2-hydroxy-                                      |
| 4    | 5.8591   | 0.1370   | 2,4-Hexadiyne                                                        |
| 5    | 6.2632   | 0.4328   | 1,6-Anhydro-2,4-dideoxy-.beta.-D-ribo-hexopyranose                   |
| 6    | 7.8114   | 0.0989   | 2-Formylhistamine                                                    |
| 7    | 8.5661   | 0.1080   | 4H-Pyran-4-one, 2,3-dihydro-3,5-dihydroxy-6-methyl-                  |
| 8    | 9.0578   | 0.1438   | Terpinen-4-ol                                                        |
| 9    | 9.2672   | 0.2633   | 2-Pentenal, (E)-                                                     |
| 10   | 9.6080   | 0.1124   | N-Benzyl-2-phenethylamine                                            |
| 11   | 9.8417   | 2.7777   | Benzene, 2-methoxy-4-methyl-1-(1-methylethyl)-                       |
| 12   | 10.0072  | 0.2455   | Cyclopentane, 1-ethyl-1-methyl-                                      |
| 13   | 10.2117  | 0.0689   | Silane, butoxytrimethyl-                                             |
| 14   | 10.6450  | 0.4519   | Thymol                                                               |
| 15   | 11.0053  | 0.8798   | 2-Methoxy-4-vinylphenol                                              |
| 16   | 12.7823  | 0.2113   | 3,5-Dimethylanisole                                                  |
| 17   | 13.0160  | 0.1051   | Allyl(2-butoxy)dimethylsilane                                        |
| 18   | 13.0550  | 0.1587   | 7H-1-Benzopyran-7-one, 5-methoxy-6-methyl-2-phenyl-                  |
| 19   | 13.3276  | 0.2410   | 1,2-Dimethoxy-4-(1-methoxyethenyl)benzene                            |
| 20   | 13.7025  | 0.2206   | 1,3-Benzodioxole, 4-methoxy-6-(2-propenyl)-                          |
| 21   | 14.0676  | 0.8009   | Benzene, 1,2,3-trimethoxy-5-(2-propenyl)-                            |
| 22   | 15.1631  | 54.5754  | Apinol                                                               |
| 23   | 15.2459  | 0.4499   | 2,6-Dimethyl-1,3,5,7-octatetraene, E,E-                              |
| 24   | 15.7376  | 0.3259   | 2-Propenoic acid, 3-(4-hydroxy-3-methoxyphenyl)-                     |
| 25   | 15.8593  | 0.0635   | 1-[4-Acetyl-1-(4-amino-phenyl)-2,5-dimethyl-1H-pyrrol-3-yl]-ethanone |
| 26   | 16.1952  | 0.0877   | 4-((1E)-3-Hydroxy-1-propenyl)-2-methoxyphenol                        |
| 27   | 16.7990  | 0.0597   | 3-Methyl-2-butanone, 4-tert-butyltrimethylsilyloxy-                  |
| 28   | 17.1105  | 0.0461   | 3,3-Dimethyl-5-phenyl-3H-pyrazole                                    |
| 29   | 17.8068  | 0.0896   | 1,2,3,1',2',3'-Hexamethyl-bicyclopentyl-2,2'-diene                   |
| 30   | 17.9041  | 0.0438   | Chromone, 3-methyl-7-nitro-                                          |

|    |         |         |                                                                                      |
|----|---------|---------|--------------------------------------------------------------------------------------|
| 31 | 17.9723 | 0.1286  | 1-(4-Hydroxyphenyl)-2-(3-hydroxyphenyl)ethane                                        |
| 32 | 18.0258 | 0.1160  | Hexadecanoic acid, methyl ester                                                      |
| 33 | 18.1427 | 0.9151  | Benzeneacetic acid, 3-hydroxy-, ethyl ester                                          |
| 34 | 18.2011 | 0.1472  | Phenol, 4-octyl-                                                                     |
| 35 | 18.3910 | 0.2008  | n-Hexadecanoic acid                                                                  |
| 36 | 18.6003 | 0.1784  | Benzene, (ethenyloxy)-                                                               |
| 37 | 18.6393 | 0.1883  | Scoparone                                                                            |
| 38 | 18.6831 | 0.1413  | Chromone, 3-methyl-7-nitro-                                                          |
| 39 | 18.7172 | 0.2059  | 2-(Ethyl(m-tolyl)amino)ethyl (E)-2-methylbut-2-enoate                                |
| 40 | 18.8146 | 0.1142  | Sorbitol                                                                             |
| 41 | 19.1700 | 3.7771  | Falcarinol                                                                           |
| 42 | 19.2771 | 0.1505  | 1,2,4-Metheno-1H-cyclobuta[b]cyclopenta[d]furan,2,2a,3a,4,6a,6b-hexahydro-3a-methyl- |
| 43 | 19.5789 | 0.0716  | .alpha.-Methyl-2-naphthalenemethanol                                                 |
| 44 | 19.6666 | 0.1797  | 9,12-Octadecadienoic acid (Z,Z)-, methyl ester                                       |
| 45 | 19.8321 | 0.0505  | Phytol                                                                               |
| 46 | 19.9976 | 0.1033  | 2,9-Heptadecadiene-4,6-diyne-8-ol, (Z,E)-                                            |
| 47 | 20.1924 | 0.1758  | 6-[(1Z)-1,3-Butadienyl]-1,4-cycloheptadiene                                          |
| 48 | 20.2800 | 0.1358  | 5,8,11-Eicosatrienoic acid, methyl ester                                             |
| 49 | 20.3628 | 0.6813  | Benzene, 1-methyl-2-nitroso-                                                         |
| 50 | 20.4991 | 2.7940  | Benzene, 1-methyl-4-nitroso-                                                         |
| 51 | 20.7766 | 23.8342 | Dimethyl 1,2-diethenyltricyclo[3.1.0.0(2,4)]hexane-3,6-dicarboxylate                 |
| 52 | 21.3657 | 0.0446  | 1-Phenyl-1-nonyne                                                                    |
| 53 | 21.4193 | 0.0961  | 2-Methyl-3-butene-2-thiol                                                            |
| 54 | 21.7357 | 0.3972  | 3,4-Difluorobenzyl alcohol, 1-methylpropyl ether                                     |
| 55 | 21.8575 | 0.0506  | 1-[4-(tert-Butyl)phenyl]-2-(4-toluidino)-1-ethanone                                  |
| 56 | 21.9013 | 0.1760  | Benzene, [(butylsulfonyl)ethynyl]-                                                   |
| 57 | 21.9597 | 0.0702  | 2,5-Octadecadiynoic acid, methyl ester                                               |
| 58 | 22.5731 | 0.1031  | 3,7,11-Trimethyl-8,10- dodecadienylacetate                                           |
| 59 | 23.1866 | 0.2389  | Hexadecanoic acid, 2-hydroxy-1-(hydroxymethyl)ethyl ester                            |
| 60 | 24.5596 | 0.3765  | 9,12-Octadecadienoic acid (Z,Z)-, 2-hydroxy-1-(hydroxymethyl)ethyl ester             |
| 61 | 24.6229 | 0.0717  | Methyl 6,9,12-hexadecatrienoate                                                      |
| 62 | 27.9822 | 0.1282  | Vitamin E                                                                            |
| 63 | 29.4477 | 0.1489  | Stigmasterol                                                                         |

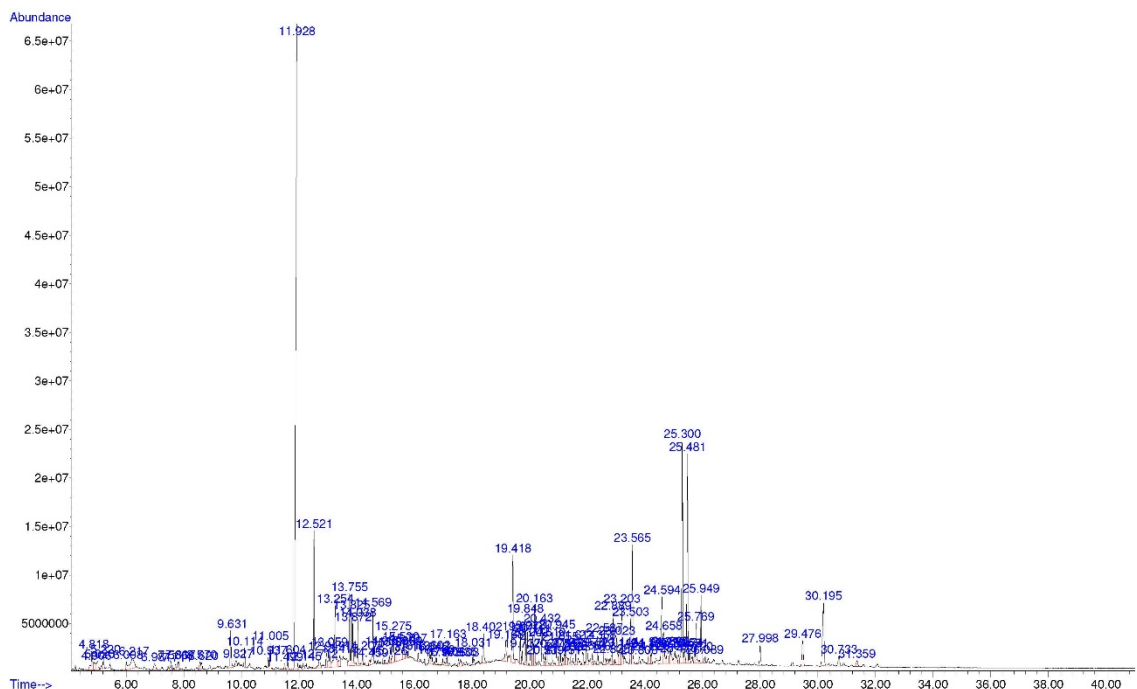

**Figure S5.** GC-MS spectrum of *D. carota* subsp. *gummifer* hydromethanolic extract

**Table S5.** GC/MS analysis of *D. carota* subsp. *gummifer* hydromethanolic extract

| Peak | RT (min) | Area (%) | Library/ID                                                                      |
|------|----------|----------|---------------------------------------------------------------------------------|
| 1    | 4.8170   | 0.8156   | Oxime-, methoxy-phenyl-                                                         |
| 2    | 4.9047   | 0.3327   | 1-Butanol                                                                       |
| 3    | 5.0215   | 0.4478   | Tiglic acid                                                                     |
| 4    | 5.2211   | 0.3062   | 2-Cyclopenten-1-one, 2-hydroxy-                                                 |
| 5    | 6.0098   | 0.1819   | Phenol                                                                          |
| 6    | 6.2192   | 1.1207   | 1,6-Anhydro-2,4-dideoxy-.beta.-D-ribo-hexopyranose                              |
| 7    | 6.9836   | 0.2942   | Benzeneacetaldehyde                                                             |
| 8    | 7.5678   | 0.3091   | Benzene, 2-methoxy-4-methyl-1-(1-methylethyl)-                                  |
| 9    | 7.7090   | 0.1360   | Phenol, 2-methoxy-                                                              |
| 10   | 7.8161   | 0.3355   | Thiophene-3-ol, tetrahydro-, 1,1-dioxide                                        |
| 11   | 8.5707   | 0.2629   | 4H-Pyran-4-one, 2,3-dihydro-3,5-dihydroxy-6-methyl-                             |
| 12   | 8.6194   | 0.1738   | 4-Ethylbenzamide                                                                |
| 13   | 9.6321   | 0.9928   | Benzoofuran, 2,3-dihydro-                                                       |
| 14   | 9.8268   | 0.2266   | 5-Hydroxymethylfurfural                                                         |
| 15   | 10.1141  | 0.4072   | Geraniol                                                                        |
| 16   | 10.9369  | 0.2497   | 2,3-Dehydro-1,8-cineole                                                         |
| 17   | 11.0051  | 0.5331   | 2-Methoxy-4-vinylphenol                                                         |
| 18   | 11.4968  | 0.1022   | Phenol, 2,6-dimethoxy-                                                          |
| 19   | 11.6039  | 0.2777   | 2,6-Octadien-1-ol, 3,7-dimethyl-, acetate, (Z)-                                 |
| 20   | 11.9252  | 22.7288  | 2,6-Octadien-1-ol, 3,7-dimethyl-, acetate, (Z)-                                 |
| 21   | 12.1443  | 0.2090   | Benzoic acid, 3,4-dihydroxy-, methyl ester                                      |
| 22   | 12.5192  | 2.7038   | Caryophyllene                                                                   |
| 23   | 12.7139  | 0.3300   | 2,4-Dimethylanisole                                                             |
| 24   | 12.9476  | 0.3458   | 1,4,7,-Cycloundecatriene, 1,5,9,9-tetramethyl-, Z,Z,Z-                          |
| 25   | 13.0596  | 0.4974   | 7H-1-Benzopyran-7-one, 5-methoxy-6-methyl-2-phenyl-                             |
| 26   | 13.2544  | 1.8704   | 2,6-Dimethyl-3,5,7-octatriene-2-ol, ,E,E-                                       |
| 27   | 13.4150  | 0.4433   | 2,4-Difluorobenzoic acid, 4-chlorophenyl ester                                  |
| 28   | 13.7558  | 1.4863   | 6-epi-shyobunol                                                                 |
| 29   | 13.8240  | 1.0196   | 6-epi-shyobunol                                                                 |
| 30   | 13.8727  | 0.8066   | 2-Pentene, 2-methyl-                                                            |
| 31   | 14.0382  | 0.8926   | 7-Oxabicyclo[4.1.0]heptane, 1-methyl-4-(1-methylethenyl)-                       |
| 32   | 14.2086  | 0.3386   | 2,3,5,6-Tetrafluoroanisole                                                      |
| 33   | 14.4569  | 0.1671   | 1H-3a,7-Methanoazulene, octahydro-1,4,9,9-tetramethyl-                          |
| 34   | 14.5689  | 1.3036   | Caryophyllene oxide                                                             |
| 35   | 14.9292  | 0.2714   | Apiol                                                                           |
| 36   | 15.1239  | 0.1109   | Benzenemethanol, 2,4-dimethyl-                                                  |
| 37   | 15.1629  | 0.2980   | 3-Methylene-bicyclo[3.2.1]oct-6-en-8-ol                                         |
| 38   | 15.2748  | 0.8895   | 2,4-Dimethyl-3-nitrobicyclo[3.2.1]octan-8-one                                   |
| 39   | 15.3722  | 0.5938   | Pentanamide, N-tetrahydrofurfuryl-                                              |
| 40   | 15.5280  | 1.3467   | 1,2,3,5-Cyclohexanetetrol, (1.alpha.,2.beta.,3.alpha.,5.beta.)-                 |
| 41   | 15.6400  | 0.4850   | Cyclohexane, 1R-acetamido-2,3-cis-epoxy-4-trans-acetoxy-                        |
| 42   | 15.7958  | 0.2512   | cis-9-Hexadecenal                                                               |
| 43   | 16.1317  | 0.1797   | 1,3,5-Triethyl-1-oxycyclotrisiloxane                                            |
| 44   | 16.5455  | 0.3570   | Benzoic acid, 4-hydroxy-3,5-dimethoxy-, hydrazide                               |
| 45   | 16.6040  | 0.2947   | Caryophyllene oxide                                                             |
| 46   | 16.7647  | 0.2264   | 4-Isopropyl-trans-bicyclo[4.3.0]-2-nonen-8-one, (4R,S)-                         |
| 47   | 16.9837  | 0.1029   | 2,6,10-Dodecatrien-1-ol, 3,7,11-trimethyl-9-(phenylsulfonyl)-, (E,E)-           |
| 48   | 17.1055  | 0.1626   | trans-Z-.alpha.-Bisabolene epoxide                                              |
| 49   | 17.1639  | 0.4616   | Bicyclo[3.1.1]heptane, 2,6,6-trimethyl-, [1R-(1.alpha.,2.beta.,5.alpha.)]-      |
| 50   | 17.5339  | 0.1564   | 1-Cyclohexene-1-carboxaldehyde, 4-(1-methylethyl)-                              |
| 51   | 17.6020  | 0.2695   | 6-Octen-1-ol, 3,7-dimethyl-, propanoate                                         |
| 52   | 18.0305  | 0.2683   | Hexadecanoic acid, methyl ester                                                 |
| 53   | 18.4005  | 0.9902   | n-Hexadecanoic acid                                                             |
| 54   | 19.1698  | 0.7739   | Pyrido[3,4-d]pyridazine-4,5(3H,6H)-dione, 1-(2-furfuryl)-7-methyl-              |
| 55   | 19.4181  | 2.6122   | 4-Hydroxy-4-(4,6-dimethylcyclohex-3-enyl)butan-2-one                            |
| 56   | 19.6761  | 0.6248   | 9,12-Octadecadienoic acid (Z,Z)-, methyl ester                                  |
| 57   | 19.7345  | 0.2918   | 7,10,13-Hexadecatrienoic acid, methyl ester                                     |
| 58   | 19.8465  | 0.8915   | Phytol                                                                          |
| 59   | 19.9195  | 0.6545   | Bicyclo[4.1.0]heptan-3-ol, 3,7,7-trimethyl-, [1S-(1.alpha.,3.alpha.,6.alpha.)]- |
| 60   | 20.0412  | 0.7440   | 9,12-Octadecadienoic acid (Z,Z)-                                                |
| 61   | 20.1094  | 0.7385   | 9,12,15-Octadecatrienoic acid, (Z,Z,Z)-                                         |

|     |         |        |                                                                                          |
|-----|---------|--------|------------------------------------------------------------------------------------------|
| 62  | 20.1629 | 1.2323 | 3-Carene                                                                                 |
| 63  | 20.4307 | 1.1580 | Ar-tumerone                                                                              |
| 64  | 20.5378 | 0.2069 | Bicyclo[3.1.1]hept-2-en-4-ol, 2,6,6-trimethyl-, acetate                                  |
| 65  | 20.6109 | 0.8580 | Hexan-3-yl (E)-2-methylbut-2-enoate                                                      |
| 66  | 20.7764 | 0.3497 | Cyclopropanol, 1-(3,7-dimethyl-1-octenyl)-                                               |
| 67  | 20.9468 | 1.0063 | 3-Methyl-2-butenic acid, 2,7-dimethyloct-7-en-5-yn-4-yl ester                            |
| 68  | 21.0539 | 0.4908 | 2-Butenoic acid, 2-methyl-, 2-methylpropyl ester, (E)-                                   |
| 69  | 21.1513 | 0.1800 | 2-Buten-1-one, 1-(2,6,6-trimethyl-1-cyclohexen-1-yl)-                                    |
| 70  | 21.2048 | 0.2704 | 2-Butenoic acid, 3-methyl-, phenylmethyl ester                                           |
| 71  | 21.2535 | 0.6101 | Benzyl .beta.-d-glucoside                                                                |
| 72  | 21.4385 | 0.3716 | Ethylmalononitrile, 1-cyclohexyl-                                                        |
| 73  | 21.6138 | 0.4928 | 2-Dodecylcyclohexanone                                                                   |
| 74  | 21.8378 | 0.4416 | Butylphosphonic acid, butyl 3-phenylpropyl ester                                         |
| 75  | 21.9790 | 0.5768 | Silane, trichlorocyclohexyl-                                                             |
| 76  | 22.1786 | 0.2419 | Cyclohexanecarboxylic acid, 3-phenylpropyl ester                                         |
| 77  | 22.3587 | 0.4709 | Cyclohexanecarboxylic acid, 4-nitrophenyl ester                                          |
| 78  | 22.5875 | 0.7656 | 3-Methyl-2-butenic acid, 2-methyloct-5-yn-4-yl ester                                     |
| 79  | 22.8358 | 0.2559 | 2-Dimethylamino-2'-methoxyacetophenone                                                   |
| 80  | 22.8894 | 1.0544 | 3-Methyl-2-butenic acid, 2-methyloct-5-yn-4-yl ester                                     |
| 81  | 23.0208 | 0.8466 | Cyclopentane, 1-ethyl-1-methyl-                                                          |
| 82  | 23.1085 | 0.3009 | 3-Methyl-2-butenic acid, 2,7-dimethyloct-7-en-5-yn-4-yl ester                            |
| 83  | 23.1426 | 0.3489 | 3-Methyl-2-butenic acid, 2,7-dimethyloct-7-en-5-yn-4-yl ester                            |
| 84  | 23.2010 | 1.3329 | Hexadecanoic acid, 2-hydroxy-1-(hydroxymethyl)ethyl ester                                |
| 85  | 23.5028 | 0.9459 | 1,5-Heptadien-4-one, 3,3,6-trimethyl-                                                    |
| 86  | 23.5661 | 2.4215 | Anhydro-4,6-dimethyl-3-[p-chlorophenyl]-7-hydroxy-1,2,4-triazolo[1,5a]pyrimidinium-5-one |
| 87  | 23.8096 | 0.2017 | Hexane, 1-bromo-6-chloro-                                                                |
| 88  | 24.1406 | 0.3296 | 1,2-Benzenediol, o-(3-methylbut-2-enoyl)-                                                |
| 89  | 24.1698 | 0.3228 | 1,2-Benzenediol, o-(3-methylbut-2-enoyl)-                                                |
| 90  | 24.2185 | 0.2691 | 3-Methyl-2-butenic acid, 2-methyloct-5-yn-4-yl ester                                     |
| 91  | 24.5934 | 2.3798 | 9,12-Octadecadienoic acid (Z,Z)-, 2-hydroxy-1-(hydroxymethyl)ethyl ester                 |
| 92  | 24.6567 | 0.9178 | Cyclooctene, 3-ethenyl-                                                                  |
| 93  | 24.7736 | 0.6793 | 2-Pentene, 4,4-dimethyl-                                                                 |
| 94  | 24.8855 | 0.4922 | Lomustine                                                                                |
| 95  | 25.0365 | 0.4575 | 5-Nitro-2-thienylmethylenecyclohexanecarboxylic hydrazide                                |
| 96  | 25.1728 | 0.2426 | 1,1-Propanedicarbonitrile, 1,2-dicyclohexyl-                                             |
| 97  | 25.2994 | 5.4961 | 1,1-Propanedicarbonitrile, 1,2-dicyclohexyl-                                             |
| 98  | 25.3724 | 0.4097 | 2-Butyl-.delta.1-pyrroline                                                               |
| 99  | 25.4795 | 4.9199 | 3-Methylbut-2-enoic acid, 2,3,4,6-tetrachlorophenyl ester                                |
| 100 | 25.5525 | 0.3324 | Squalene                                                                                 |
| 101 | 25.7181 | 0.2254 | Hexacosane                                                                               |
| 102 | 25.7716 | 0.9295 | 3-Methyl-2-butenic acid, cyclobutyl ester                                                |
| 103 | 25.9469 | 1.7053 | 3-Methyl-but-2-enoic acid, 1,7,7-trimethyl-bicyclo[2.2.1]hept-2-yl ester                 |
| 104 | 26.0881 | 0.1335 | Ethyl 2-(methylamino)-1-phenyl-3-cyclohexene-1-carboxylate                               |
| 105 | 27.9966 | 0.5581 | Vitamin E                                                                                |
| 106 | 29.4766 | 0.8805 | Stigmasterol                                                                             |
| 107 | 30.1924 | 2.5249 | $\gamma$ -Sitosterol                                                                     |
| 108 | 30.7328 | 0.4060 | $\beta$ -Amyrin                                                                          |
| 109 | 31.3608 | 0.2599 | $\alpha$ -Amyrin                                                                         |

## 5. Mycelial growth inhibition tests

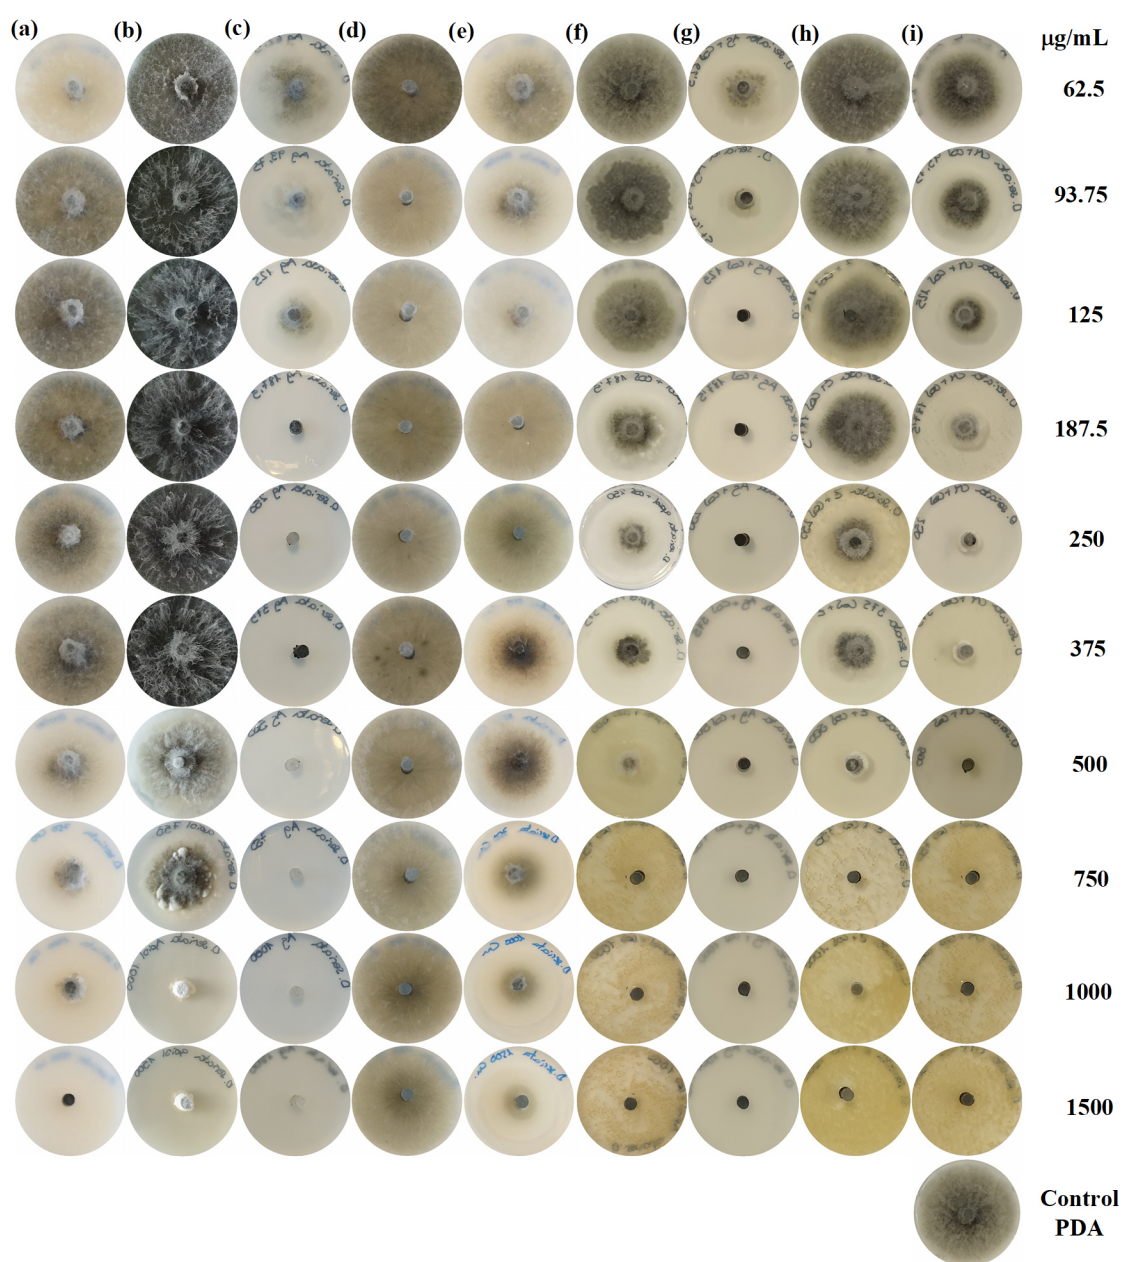

**Figure S6.** Sensitivity test for *D. seriata*. Radial growth of mycelium for: (a) COS, (b) apiole, (c) geranyl acetate, (d) *D. carota* extract, (e) *C. maritimum* extract, (f) COS-apiole, (g) COS-geranyl acetate, (h) COS-*D. carota* extract, (i) COS-*C. maritimum* extract. From top to bottom: 62.5, 93.75, 125, 187.5, 250, 375, 500, 750, 1000 and 1500  $\mu\text{g}\cdot\text{mL}^{-1}$ . Only one replicate is shown.
